## Supplemental Figure 1

*Tg(CV,tUAS:tRFP)<sup>w80</sup>*

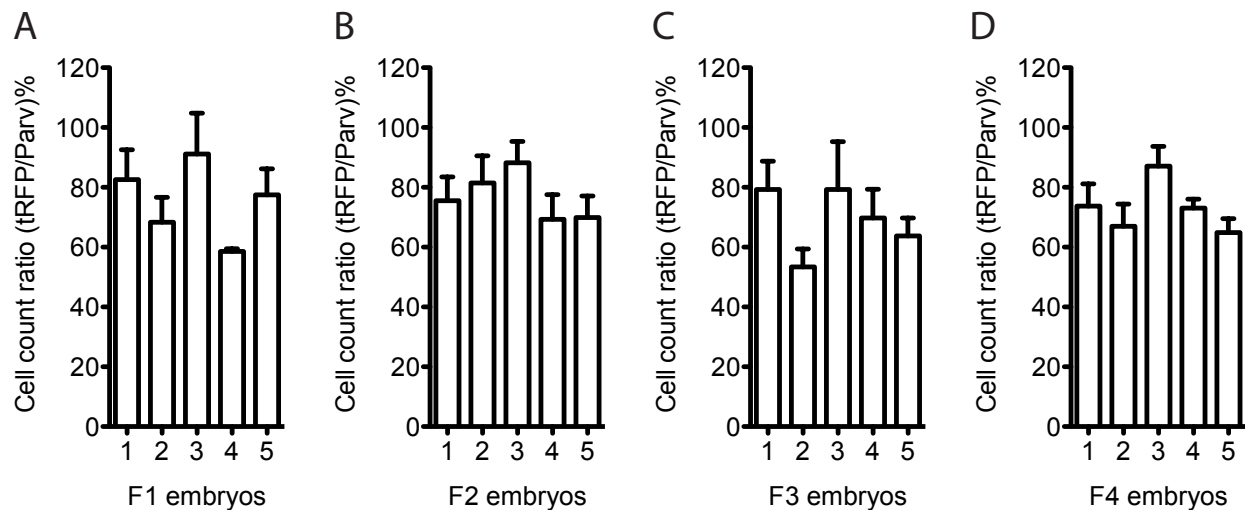

*Tg(CV,tUAS:nlsEos)<sup>w81</sup>*

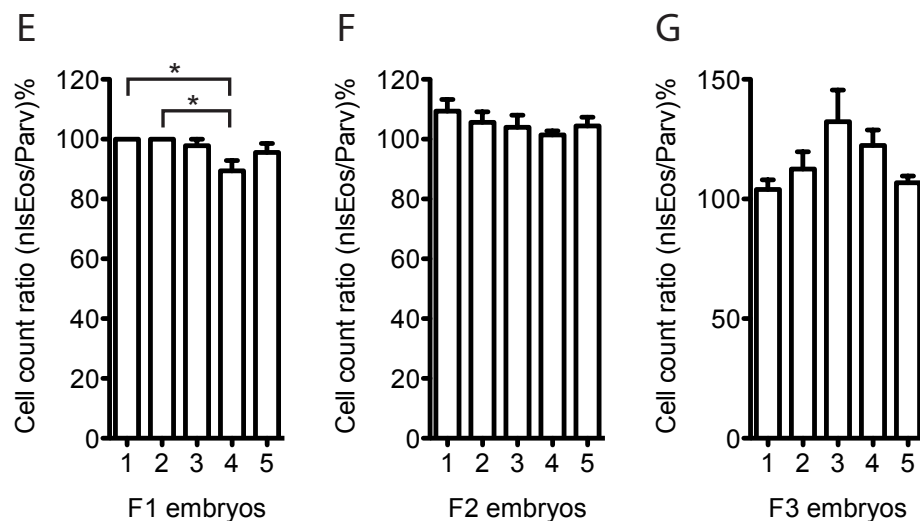

**Fig. S1. *tUAS* expression is consistent between larvae of the same clutch.** To determine if *tUAS* is silenced within a clutch we compared *tRFP* and *nlsEos* expression in five different larvae for each cross between F2 or F3 of *Tg(CC,myo6b:nlsTrpR-G4AD)<sup>w83</sup>* driver line with F1-F4 of *Tg(CV,tUAS:tRFP)<sup>w80</sup>* reporter line (A-D) or with F1-F3 of *Tg(CV,tUAS:nlsEos)<sup>w81</sup>* reporter line (E-G). Progeny double positive for the lens markers were sorted out and stained for Parvalbumin, which labels mature hair cells. Head neuromasts, consisting of hair cell clusters, were scored for *tRFP* and Parvalbumin expression or *nlsEos* and Parvalbumin expression. In each case, hair cell expression in 5 neuromasts from each embryo at 5 dpf were analyzed and graphed. There is no statistical difference between expression in embryos of the same clutch in F1-F4 generations of *Tg(CV,tUAS:tRFP)<sup>w80</sup>* and F2-F3 generations of *Tg(CV,tUAS:nlsEos)<sup>w81</sup>*. We see a difference in F1 embryos of *Tg(CV,tUAS:nlsEos)<sup>w81</sup>* (E), although this difference might be due to multiple insertions present in the F1 generation. In all cases, statistical analysis was 1 way ANOVA with Tukey's pair-wise column comparison post-test. Error bars show SEM. In (E),  $F=3.741$ ,  $R^2=0.428$ ,  $P=0.0198$ .
